# Supplementary material for: Cloning and Characterization of Two Iridoid Synthase Homologs from Swertia Mussotii
Source: MDPI journal article supplement (doi:10.3390/molecules22081387), 2017-08-22
Supplement: s1 [file s1]

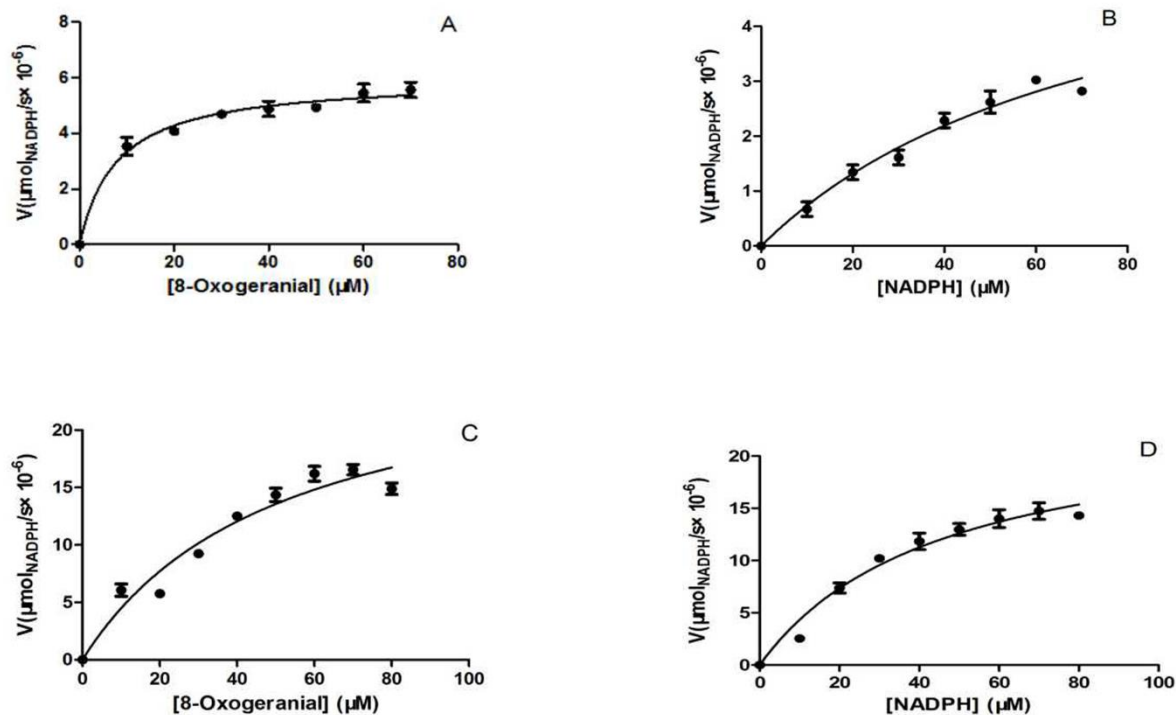

**Figure S1.** Steady-state kinetic analysis of the iridoid synthase reaction. (A) Saturation curve of SmIS1 for 8-oxogeranial at a fixed NADPH concentration of 100  $\mu\text{M}$ . (B) Saturation curve of SmIS1 for NADPH at a fixed 8-oxogeranial concentration of 30  $\mu\text{M}$ . (C) Saturation curve of SmIS2 for 8-oxogeranial at a fixed NADPH concentration of 100  $\mu\text{M}$ . (D) Saturation curve of SmIS2 for NADPH at a fixed 8-oxogeranial concentration of 30  $\mu\text{M}$ . Reaction rates were measured spectrophotometrically, monitoring NADPH consumption at 340 nm. Individual data points are averages of three replicates. Error bars represent standard errors (SE).
